# Supplementary material for: Direct imaging and manipulation of ionic diffusion in mixed electronic–ionic conductors
Source: Royal Society of Chemistry journal article supplement (doi:10.1039/c8nr02887g), 2018-01-01
Supplement: c8nr02887g1.pdf [file c8nr02887g1.pdf]

## Supporting Information

### Direct imaging and manipulation of ionic diffusion in mixed electronic-ionic conductors

*J. Op de Beeck\**

*IMEC, Kapeldreef 75*

*KU Leuven, Department of Physics and Astronomy, Celestijnenlaan 200D, B-3001  
3001*

*Belgium*

*Nouha Labyedh*

*IMEC, Kapeldreef 75*

*KU Leuven, Department of Microbial and Molecular Systems, Celestijnenlaan 200D  
3001*

*Belgium*

*Dr. A. Sepúlveda, Dr. V. Spampinato, Dr. A. Franquet, Dr. T. Conard*

*IMEC, Kapeldreef 75*

*3001*

*Belgium*

*Prof. Dr. P. M. Vereecken*

*IMEC, Kapeldreef 75*

*KU Leuven, Department of Microbial and Molecular Systems, Celestijnenlaan 200D  
3001*

*Belgium*

*Dr. U. Celano\**

*IMEC, Kapeldreef 75*

*3001*

*Belgium*

Corresponding authors: [Jonathan.OpdeBeeck@imec.be](mailto:Jonathan.OpdeBeeck@imec.be), [Umberto.Celano@imec.be](mailto:Umberto.Celano@imec.be)

Keywords: Li-ion kinetics, 3D thin-film batteries, ASB, C-AFM, SIMS

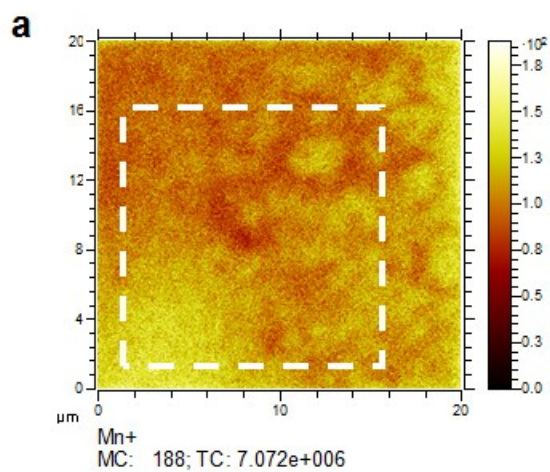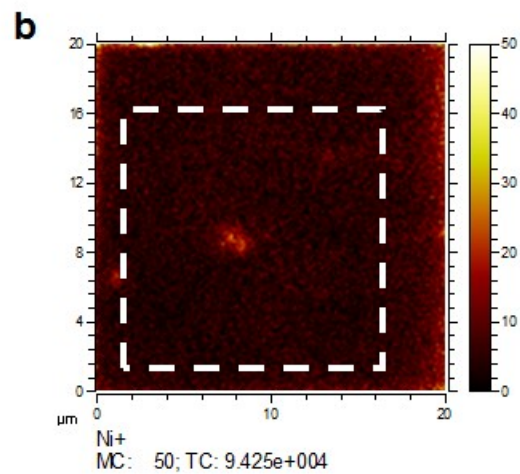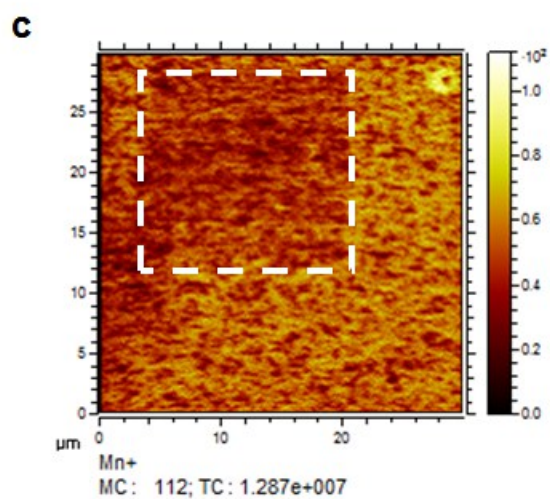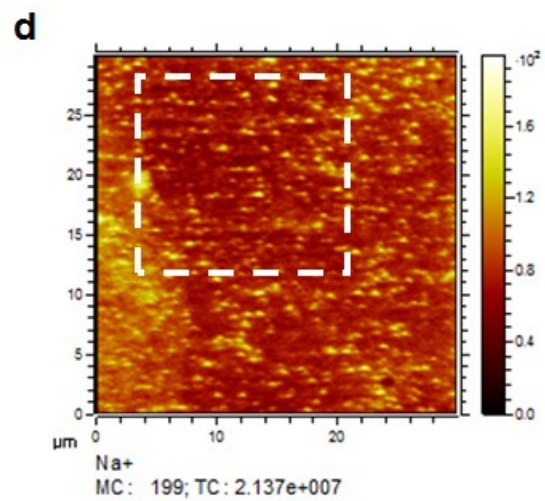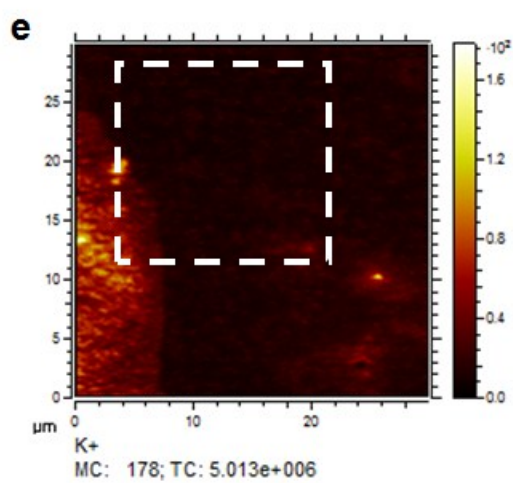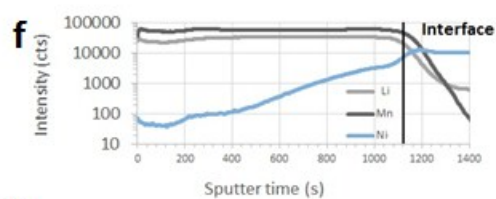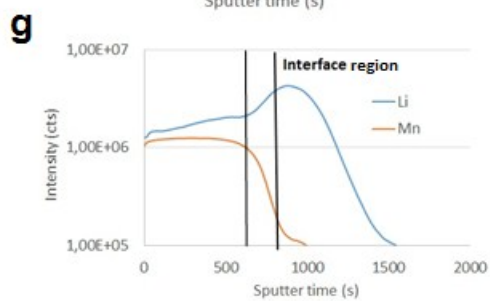

**Figure S1.** Elemental analysis by SIMS. The chemical maps at the top surface of the other elements detected for the Figure 2c (electrodeposited LMO) of the main text are shown: in **(a)**  $\text{Mn}^+$  **(b)**  $\text{Ni}^+$ . Similarly in **(c)**  $\text{Mn}^+$  **(d)**  $\text{Na}^+$  and **(e)**  $\text{K}^+$  maps are shown for the RF-sputtered LMO. For both cases the pre-scanned area is indicated by a white square. The depth profiles showing the  $\text{Li}^+$  distribution reaching the bottom electrode interface are presented in **(f)** and **(g)**.

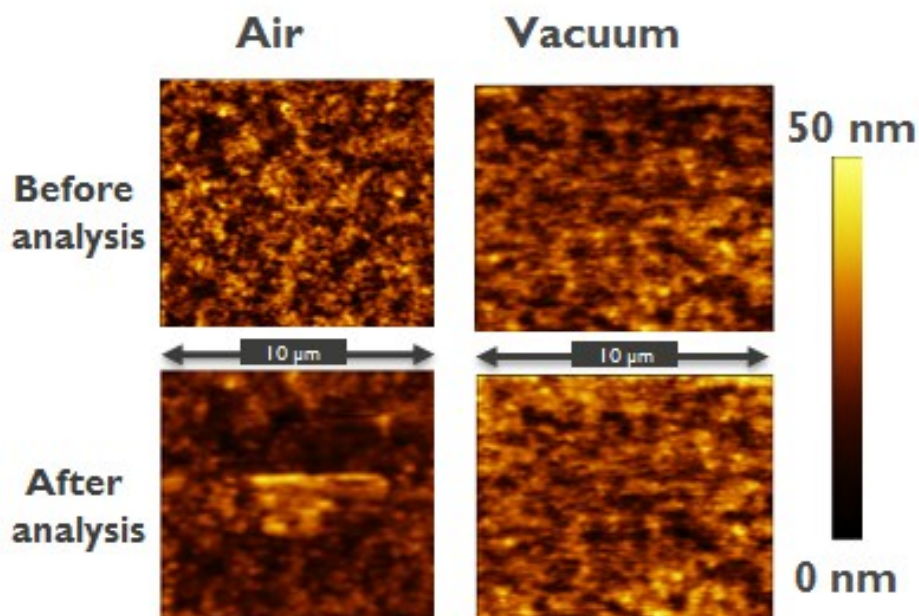

**Figure S2.** Tip-induced surface modification. Morphological surface changes are consistently observed when the measurements are performed in air. The latter can be ascribed to undesired side reactions occurring in presence of the meniscus (absorbed water layer). The reactive lithium can form a number of detrimental composites on the top surface in ambient conditions. This is due to an electrolytic half-cell which is formed by the presence of a water meniscus between tip and sample. This water layer can act as a Li-ion reservoir and in combination with an applied electric field at the AFM tip it can induce multiple oxidation procedures leading to the formation of

protrusions as seen in the case of air. For this reason our measurements are performed in high vacuum (below  $10^{-6}$  mbar), where the undesired effect is suppressed as in Figure 1.
